# Supplementary material for: UV-light microscope: improvements in optical imaging for a secondary ion mass spectrometer
Source: Royal Society of Chemistry journal article supplement (doi:10.1039/c4ja00349g), 2015-01-01
Supplement: c4ja00349g2.pdf [file c4ja00349g2.pdf]

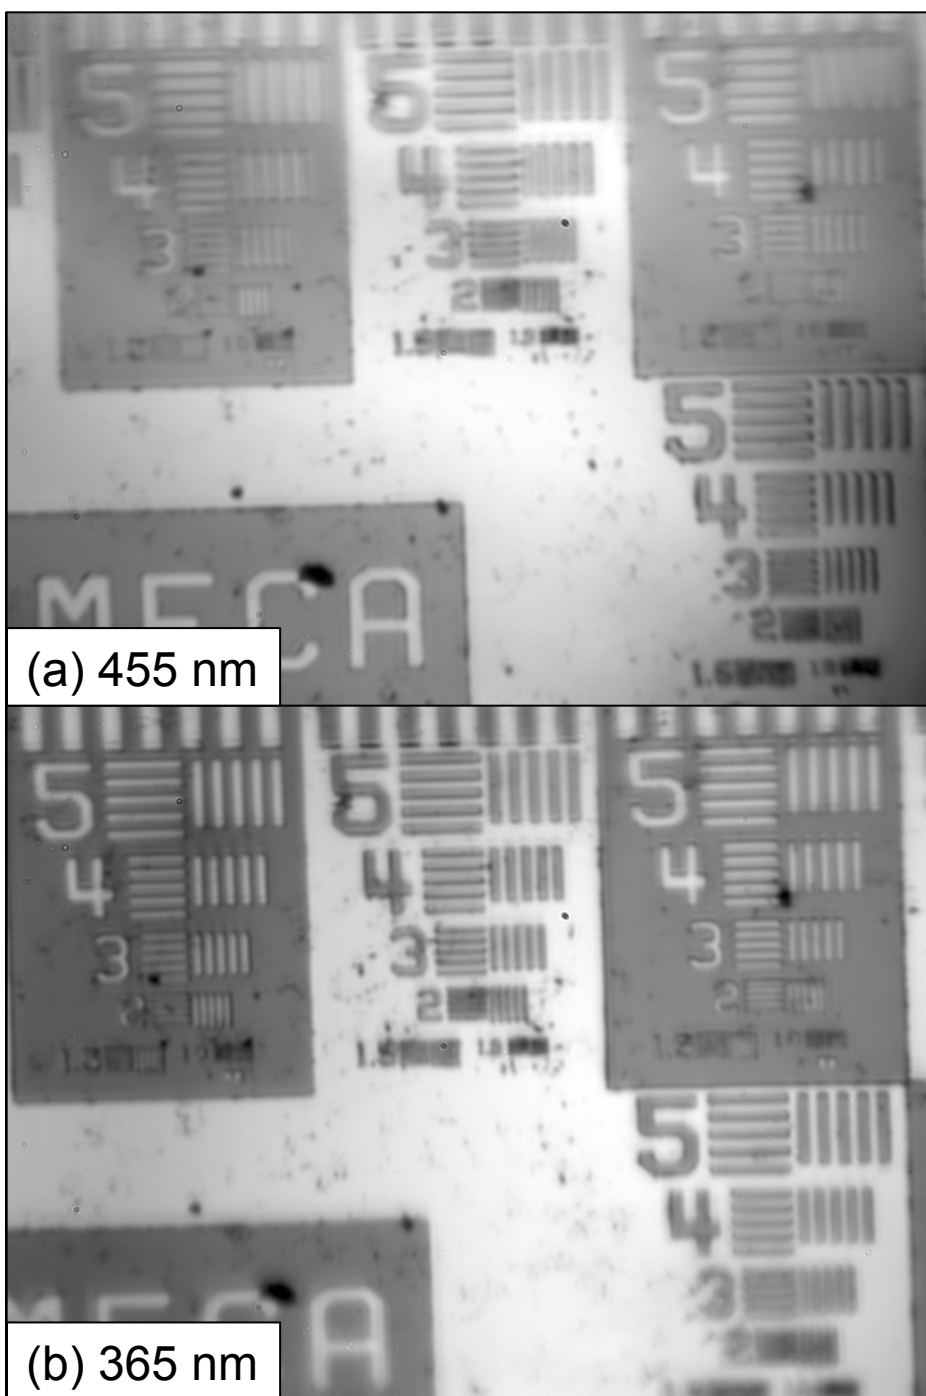

Fig. S2. Images of resolution calibration targets using the new UV-light optics for different wavelengths of illumination sources. (a) 455 nm blue LED illumination. 2  $\mu\text{m}$  lines are resolved, but not 1.5  $\mu\text{m}$  lines. (b) 365 nm UV-light LED illumination. 1.5  $\mu\text{m}$  lines are resolved but not 1.0  $\mu\text{m}$  lines. These images were taken before front-face mirror was used.

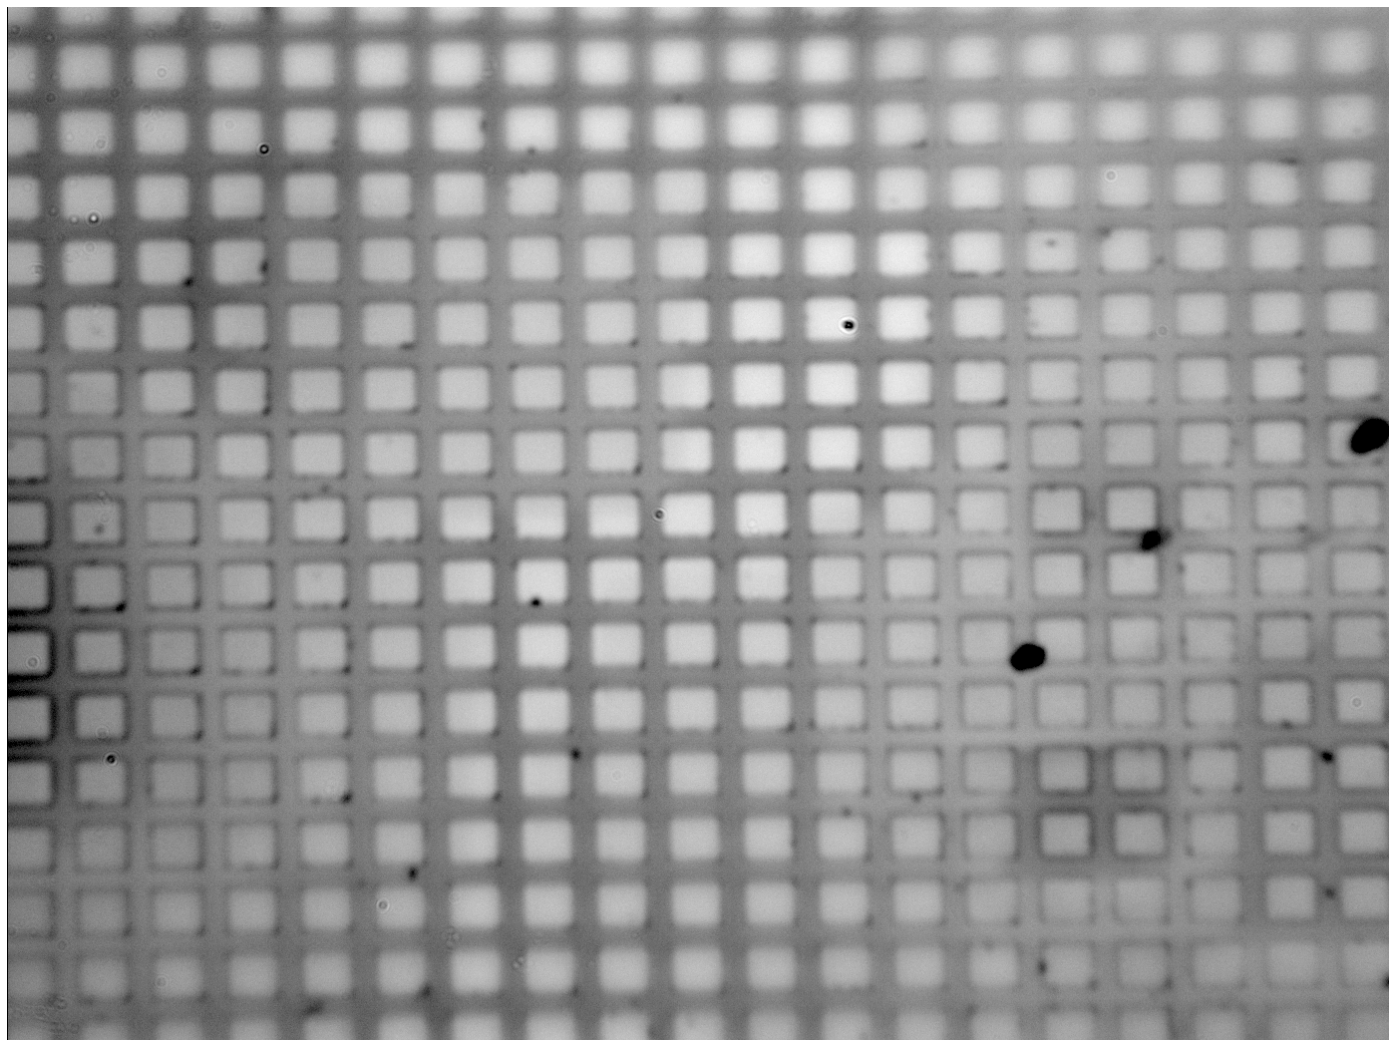

Fig. S3. Optical microscope image of 25 $\mu$ m Si-grid using the new UV-light optics. The field of view is 450  $\mu$ m  $\times$  380  $\mu$ m using maximum zooming of the zoom lens. Grid lines are slightly defocused at the top and bottom of the image.
